# Supplementary material for: First paramagnetic PdIIcomplex with a PdN4S2coordination core
Source: Royal Society of Chemistry journal article supplement (doi:10.1039/c2dt32505e), 2012-11-08
Supplement: c2dt32505e.pdf [file c2dt32505e.pdf]

## Electronic Supplementary Information

### First paramagnetic Pd<sup>II</sup> complex with a PdN<sub>4</sub>S<sub>2</sub> coordination core

Damir A. Safin,\* Maria G. Babashkina\* and Yann Garcia

*Institute of Condensed Matter and Nanosciences, MOST - Inorganic Chemistry, Université Catholique de Louvain, Place L. Pasteur 1, 1348 Louvain-la-Neuve, Belgium. Fax: +32(0) 1047 2330; Tel: +32(0) 1047 2831; E-mail: damir.safin@ksu.ru, maria.babashkina@ksu.ru*

**Physical measurements:** Infrared spectra (Nujol) were recorded with a Thermo Nicolet 380 FT-IR spectrometer in the range 400–4000 cm<sup>-1</sup>. NMR spectra (CDCl<sub>3</sub>) were obtained on a Bruker Avance 300 MHz spectrometer at 25 °C. Magnetization of powdered samples was measured between 2 and 300 K on a MPMS-5 Quantum Design magnetometer. Ball-milling was performed using steel balls in a SPEX SamplePrep 8000M Mixer/Mill. Elemental analysis was performed on a Thermoquest Flash EA 1112 Analyzer from CE Instruments.

**Synthesis of [Pd{2-PyNHC(S)NP(S)(OiPr)<sub>2</sub>-1,5-S,S'}<sub>2</sub>] ([Pd(L-1,5-S,S')<sub>2</sub>]) and [Pd{2-PyNHC(S)NP(S)(OiPr)<sub>2</sub>-1,5,7-N,N',S'}<sub>2</sub>] ([Pd(L-1,5,7-N,N',S')<sub>2</sub>]):** A suspension of **HL** (0.667 g, 2 mmol) in aqueous methanol (20 mL) was mixed with a methanol solution of potassium hydroxide (0.123 g, 2.2 mmol). An aqueous (20 mL) solution of PdCl<sub>2</sub> (0.177 g, 1 mmol) was added dropwise under vigorous stirring to the resulting potassium salt. The mixture was stirred at room temperature for 3 h and left overnight. The resulting complex was extracted with dichloromethane, washed with water and dried with anhydrous MgSO<sub>4</sub>. The solvent was then removed in vacuo. The residue was extracted by *n*-hexane. A hexane insoluble deposit was recrystallized from a dichloromethane/*n*-hexane mixture, and orange crystals of [Pd(L-1,5-S,S')<sub>2</sub>] were isolated. At the solvent-removal stage (*n*-hexane soluble), product [Pd(L-1,5,7-N,N',S')<sub>2</sub>] was isolated as a blue powder.

**[Pd(L-1,5-S,S')<sub>2</sub>]:** Yield: 0.625 g (81 %). IR  $\nu$  (cm<sup>-1</sup>): 564 (P=S), 978 (POC), 1294 (C=S), 1527 (SCN), 3251 (NH). <sup>1</sup>H NMR  $\delta$  (ppm): 1.39 (d, <sup>3</sup>J<sub>H,H</sub> = 6.2 Hz, 12H, CH<sub>3</sub>, *i*Pr), 1.42 (d, <sup>3</sup>J<sub>H,H</sub> = 6.2 Hz, 6H, CH<sub>3</sub>, *i*Pr), 1.43 (d, <sup>3</sup>J<sub>H,H</sub> = 6.1 Hz, 6H, CH<sub>3</sub>, *i*Pr), 4.90 (d. sept, <sup>3</sup>J<sub>POCH</sub> = 10.2 Hz, <sup>3</sup>J<sub>H,H</sub> = 6.1 Hz, 4H, OCH), 6.92–7.01 (m, 2H, Py), 7.55–7.67 (m, 2H, Py), 8.13–8.20 (m, 2H, Py), 8.24–8.32 (m, 2H, Py), 8.43 (br. d, <sup>4</sup>J<sub>PNCNH</sub> = 8.4 Hz, 1H, arylNH), 8.46 (br. d, <sup>4</sup>J<sub>PNCNH</sub> = 8.4 Hz, 1H, arylNH); <sup>31</sup>P{<sup>1</sup>H} NMR  $\delta$  (ppm): 51.5 (1.5P), 51.9 (1P). C<sub>24</sub>H<sub>38</sub>N<sub>6</sub>O<sub>4</sub>P<sub>2</sub>PdS<sub>4</sub> (771.21): calcd. C 37.38, H 4.97, N 10.90; found: C 37.23, H 4.90, N 10.99 %.

**[Pd(L-1,5,7-N,N',S')<sub>2</sub>]:** Yield: 0.054 g (7 %). IR  $\nu$  (cm<sup>-1</sup>): 582 (P=S), 993 (POC), 1338 (C=S), 1547 (SCN), 3218 (NH). <sup>1</sup>H NMR  $\delta$  (ppm): 0–3 (m, 36H, CH<sub>3</sub> + CH + Py, *i*Pr + Py), 19.4 (br. s, 2H, arylNH); <sup>31</sup>P{<sup>1</sup>H} NMR  $\delta$  (ppm): 76.6. C<sub>24</sub>H<sub>38</sub>N<sub>6</sub>O<sub>4</sub>P<sub>2</sub>PdS<sub>4</sub> (771.21): calcd. C 37.38, H 4.97, N 10.90; found: C 37.51, H 4.92, N 10.81 %.

**Mechanically induced solid-state synthesis of [Pd(L-1,5,7-N,N',S')<sub>2</sub>]:** The potassium salt **KL** (0.742 g, 2 mmol), which was obtained similar as described previously,<sup>1</sup> and PdCl<sub>2</sub> (0.177 g, 1 mmol) were ball-milled for 48 hours. Then the obtained blue powder was extensively treated with H<sub>2</sub>O (3 × 30 mL) and filtered. The solid material was then washed by *n*-hexane (5 × 50 mL) and dried in vacuum. The resulting product was analyzed by elemental analysis, IR and NMR spectroscopy. The obtained data testifies to the formation of the complex [Pd(L-1,5,7-

**N,N',S)**]<sub>2</sub>] with the isolated yield 0.409 g (53%). The recrystallization of the powder complex **[Pd(L-1,5,7-N,N',S)<sub>2</sub>]** from a CH<sub>2</sub>Cl<sub>2</sub>/*n*-hexane mixture (1:3, v/v) gives the X-ray suitable crystals of the complex **[Pd(L-1,5-S,S')<sub>2</sub>]**.

**X-Ray crystallography:** The X-ray diffraction data were collected on a STOE IPDS-II diffractometer. The images were indexed, integrated and scaled using the X-Area package.<sup>2</sup> Data were corrected for absorption using the PLATON program.<sup>3</sup> The structures were solved by direct methods using the SHELXS<sup>3</sup> program and refined first isotropically and then anisotropically using SHELXL97.<sup>4</sup> Hydrogen atoms were revealed from  $\Delta\rho$  maps and refined using a riding model. All figures were generated using the program Mercury.<sup>5</sup>

CCDC 864257 contains the supplementary crystallographic data for **[Pd(L-1,5-S,S')<sub>2</sub>]**. These data can be obtained free of charge via <http://www.ccdc.cam.ac.uk/conts/retrieving.html>, or from the Cambridge Crystallographic Data Centre, 12 Union Road, Cambridge CB2 1EZ, UK; fax: (+44) 1223-336-033; or e-mail: [deposit@ccdc.cam.ac.uk](mailto:deposit@ccdc.cam.ac.uk).

## References

- 1 F. D. Sokolov, D. A. Safin, M. G. Babashkina, N. G. Zabiroy, V. V. Brusko, N. A. Mironov, D. B. Krivolapov, I. A. Litvinov, R. A. Cherkasov and B. N. Solomonov, *Polyhedron*, 2007, **26**, 1550.
- 2 Stoe & Cie. X-Area. Area-Detector Control and Integration Software. Stoe & Cie, Darmstadt, Germany, 2001.
- 3 A. L. Spek, *J. Appl. Crystallogr.*, 2003, **36**, 7.
- 4 G. M. Sheldrick, *Acta Crystallogr.*, 2008, **A64**, 112.
- 5 I. J. Bruno, J. C. Cole, P. R. Edgington, M. Kessler, C. F. Macrae, P. McCabe, J. Pearson and R. Taylor, *Acta Crystallogr.*, 2002, **B58**, 389.

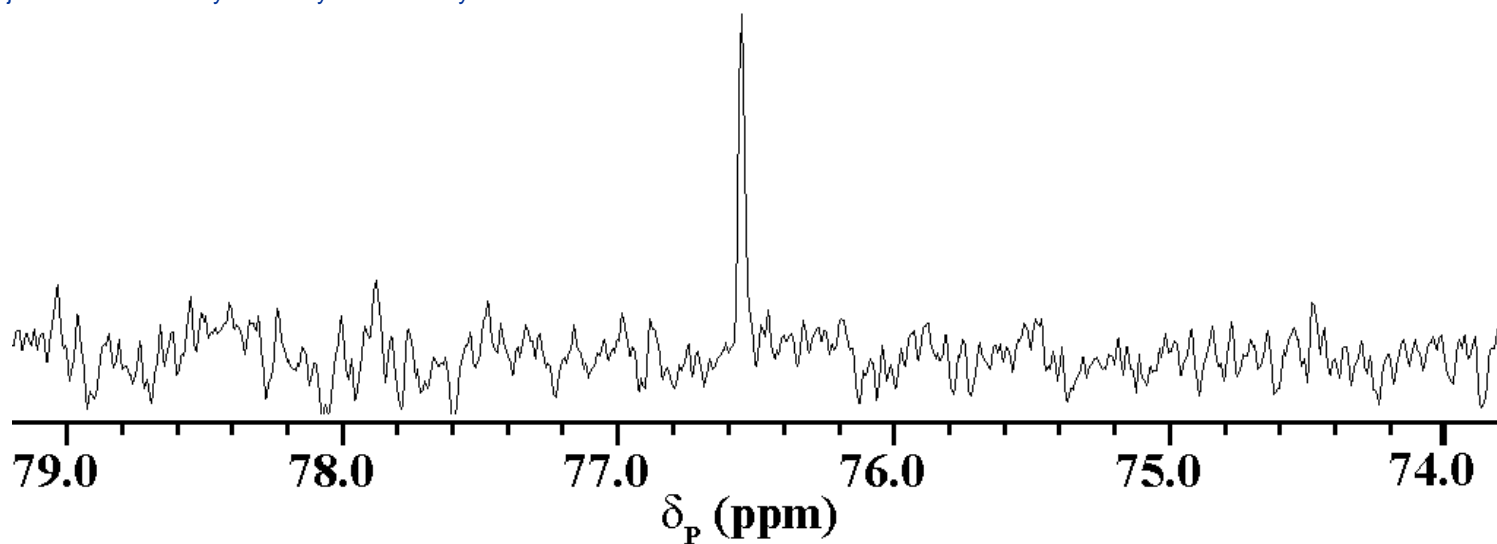

Fig. S1  $^{31}\text{P}\{^1\text{H}\}$  NMR spectrum of  $[\text{Pd}(\text{L-1,5,7-}N,N',S)_2]$  in  $\text{CDCl}_3$ .

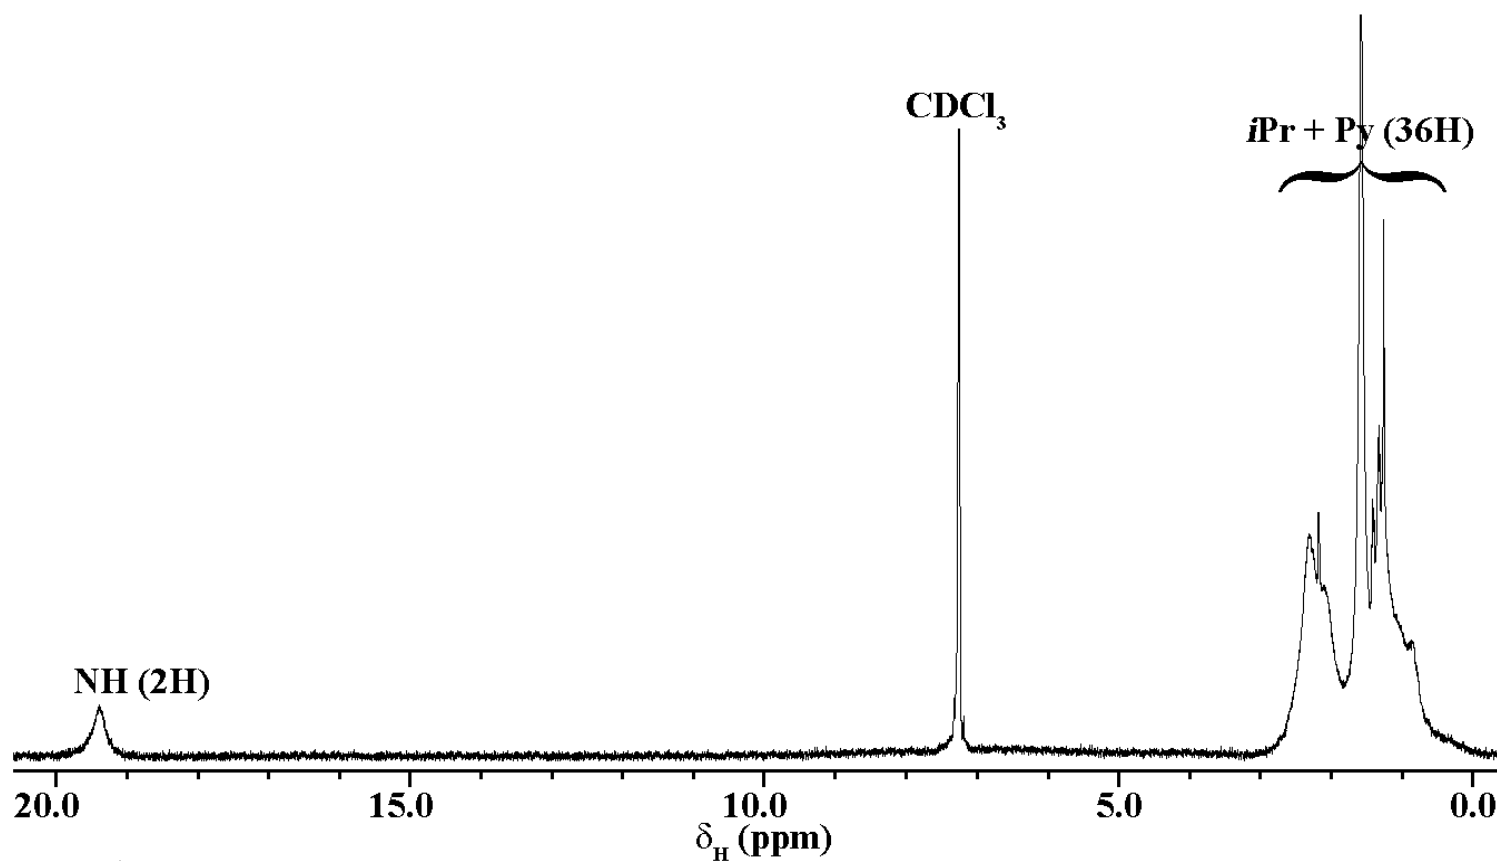

Fig. S2  $^1\text{H}$  NMR spectrum of  $[\text{Pd}(\text{L-1,5,7-}N,N',S)_2]$  in  $\text{CDCl}_3$ .

**Table S1.** Crystal data, data collection and refinement details for **[Pd(L-1,5-S,S')<sub>2</sub>]<sup>a</sup>**

|                                                |                                                                                               |
|------------------------------------------------|-----------------------------------------------------------------------------------------------|
| Empirical formula                              | C <sub>24</sub> H <sub>38</sub> N <sub>6</sub> O <sub>4</sub> P <sub>2</sub> PdS <sub>4</sub> |
| Formula weight                                 | 771.18                                                                                        |
| Temperature (K)                                | 173(2)                                                                                        |
| Crystal system                                 | triclinic                                                                                     |
| Space group                                    | <i>P</i> -1                                                                                   |
| <i>a</i> (Å)                                   | 7.9596(12)                                                                                    |
| <i>b</i> (Å)                                   | 10.4276(15)                                                                                   |
| <i>c</i> (Å)                                   | 11.7207(18)                                                                                   |
| $\alpha$ (°)                                   | 112.870(9)                                                                                    |
| $\beta$ (°)                                    | 94.830(9)                                                                                     |
| $\gamma$ (°)                                   | 107.321(6)                                                                                    |
| <i>V</i> (Å <sup>3</sup> )                     | 833.3(2)                                                                                      |
| <i>Z</i>                                       | 1                                                                                             |
| <i>D</i> <sub>calc</sub> (Mg m <sup>-3</sup> ) | 1.537                                                                                         |
| $\mu$ (mm <sup>-1</sup> )                      | 0.943                                                                                         |
| <i>F</i> (000)                                 | 396                                                                                           |
| Recording range, $\theta_{\max}$ (°)           | 2.8–30.5                                                                                      |
| Number of recorded reflections                 | 20545                                                                                         |
| Number of recorded independent reflections     | 5080 ( <i>R</i> <sub>int</sub> = 0.049)                                                       |
| <i>R</i> indices (all data)                    | <i>R</i> <sub>1</sub> = 0.0363, <i>wR</i> <sub>2</sub> = 0.0709                               |

<sup>a</sup> Measurements were made using Mo-K $\alpha$  with  $\lambda = 0.71073$  (Å).

**Table S2.** Selected bond lengths (Å) and bond angles (°) for [Pd(L-1,5-S,S')<sub>2</sub>]

| <i>Bond lengths</i>   |            |                     |            |
|-----------------------|------------|---------------------|------------|
| Pd(1)–S(1)            | 2.3322(7)  | P(1)–O(1)           | 1.5665(18) |
| Pd(1)–S(2)            | 2.3046(7)  | P(1)–O(2)           | 1.5630(17) |
| N(1)–C(1)             | 1.301(3)   | S(1)–P(1)           | 1.9958(8)  |
| N(2)–C(1)             | 1.364(3)   | S(2)–C(1)           | 1.738(2)   |
| P(1)–N(1)             | 1.5934(19) |                     |            |
| <i>Bond angles</i>    |            |                     |            |
| Pd(1)–S(1)–P(1)       | 95.86(3)   | O(2)–P(1)–N(1)      | 107.29(9)  |
| Pd(1)–S(2)–C(1)       | 115.05(8)  | P(1)–N(1)–C(1)      | 128.52(15) |
| S(1)–Pd(1)–S(2)       | 97.93(2)   | S(1)–P(1)–N(1)      | 117.62(8)  |
| S(1)–Pd(1)–S(1)a      | 180.00     | S(1)–P(1)–O(1)      | 113.32(6)  |
| S(1)–Pd(1)–S(2)a      | 82.07(2)   | S(1)–P(1)–O(2)      | 108.95(7)  |
| N(1)–C(1)–N(2)        | 119.72(19) | S(2)–C(1)–N(1)      | 128.84(16) |
| O(1)–P(1)–O(2)        | 103.02(10) | S(2)–C(1)–N(2)      | 111.43(17) |
| O(1)–P(1)–N(1)        | 105.51(10) |                     |            |
| <i>Torsion angles</i> |            |                     |            |
| N(1)–P(1)–S(1)–Pd(1)  | 66.74(8)   | O(2)–P(1)–(1)–C(1)  | –166.0(2)  |
| O(1)–P(1)–S(1)–Pd(1)  | –56.92(8)  | P(1)–N(1)–C(1)–N(2) | 179.74(18) |
| O(2)–P(1)–S(1)–Pd(1)  | –170.97(7) | P(1)–N(1)–C(1)–S(2) | –1.4(3)    |
| O(1)–P(1)–N(1)–(1)    | 84.7(2)    | S(1)–P(1)–N(1)–C(1) | –42.9(2)   |

**Table S3.** Hydrogen bond and hydrogen contact lengths (Å) and angles (°) for [Pd(L-1,5-S,S')<sub>2</sub>]<sup>a</sup>

| D–H···A             | <i>d</i> (D–H) | <i>d</i> (H···A) | <i>d</i> (D···A) | ∠(DHA) |
|---------------------|----------------|------------------|------------------|--------|
| N(2)–H(2)···N(12)#1 | 0.85(3)        | 2.52(3)          | 3.356(3)         | 168(3) |

<sup>a</sup> Symmetry transformations used to generate equivalent atoms: #1 2 – x, –y, 1 – z.
